# Supplementary material for: A novel MOF showing a ring-like planar Zn6cluster and the coexistence of a single, double, and triple wall
Source: Royal Society of Chemistry journal article supplement (doi:10.1039/c6ce01007e), 2016-01-01
Supplement: c6ce01007e1.pdf [file c6ce01007e1.pdf]

## Supporting Information

### A novel MOF showing a ring-like planar $Zn_6$ cluster and coexistence of single, double, and triple wall

Pan Pan Meng,<sup>a</sup> Li Long Dang,<sup>a,b</sup> Xiao Jing Zhang,<sup>a,b</sup> Lu Fang Ma,<sup>b</sup> Jian Qiang Li,<sup>a\*</sup> Le Le Gong,<sup>a</sup> Le Zhang,<sup>a</sup> Li Na Meng,<sup>a</sup> and Feng Luo<sup>a\*</sup>

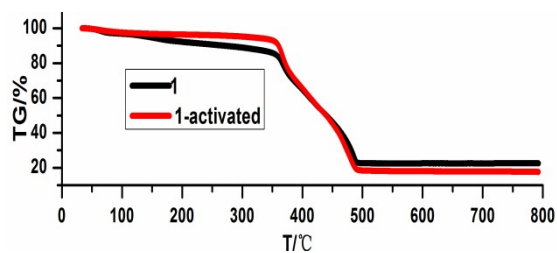

Fig. S1 The TG plots of **1** and activated samples.

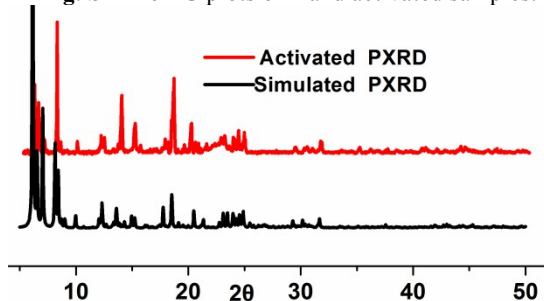

Fig. S2 The PXRD patterns simulated from crystal data of **1**, and of activated samples.
